1 **Improved income status increased obesity and decreased anemia risk compared to**  
2 **high parity and low-income in pregnant south Ghanaian women: Analysis of**  
3 **hospital-acquired data**

4  
5 **Running title: Income and overweight/obesity predict maternal anemia in Ghana**

6  
7 Thomas Kwasi Awuni<sup>1</sup> Matsui Mitsuaki<sup>2</sup> Basma Ellahi<sup>3</sup> Francis Bruno Zotor<sup>4</sup>

8  
9 <sup>1</sup> Ghana Health Service, Effutu Municipal Health Directorate, Ghana

10 <sup>2</sup> School of Tropical Medicine and Global Health, Nagasaki University, Japan

11 <sup>3</sup> Faculty of Health and Social Care, University of Chester, Chester, UK

12 <sup>4</sup> Department of Family and Community Health, University of Health and Allied Science,

13 Ghana

14

15 Correspondence to Thomas Awuni at: [agbedevit@gmail.com](mailto:agbedevit@gmail.com)/[agbe88@yahoo.com](mailto:agbe88@yahoo.com)

16 **Abstract**

17 **Background**

18 Women of reproductive age (WIFA, 15-49 years) in Ghana are experiencing an  
19 upsurge in excess body mass index (BMI) and anemia (low hemoglobin concentration  
20 (Hb of  $\leq 10.9$  g/dl)). Regions of Southern Ghana (Central, Eastern, and Volta) are  
21 recognized to have high rates of adolescent pregnancies, and is known to be associated  
22 with high risk of anemia. However, little is known for pregnant South Ghanaian women.  
23 This study aimed to examine anthropometry – maternal stature and early pregnancy BMI  
24 – and socio-demographic measures as independent risk factors for anemia in antenatal  
25 women in Southern Ghana.

26

## 27 **Methodology**

28 Baseline data on anemia from healthy pregnant women (15-49 years; n = 1278)  
29 collected through antenatal attendance in an observational cohort study was included in  
30 the descriptive and logistic regression analysis using STATA (Stata Corp LLC [US]).  
31 Anemia (dependent) and the independent variables: high parity ( $\geq 5$  children/woman);  
32 short stature ( $145 \leq 155$ cm); underweight (BMI  $< 18.5$ kg/m<sup>2</sup>), normal (BMI 18.5-  
33 24.9kg/m<sup>2</sup>), overweight (BMI 25-29.9kg/m<sup>2</sup>), and obesity (BMI  $> 30$  kg/m<sup>2</sup>) assessed with  
34 weight (kg) before the 20<sup>th</sup> week of gestation divided by height (m<sup>2</sup>) were defined  
35 following standards. Wealth status was constructed using Principal Component Analysis  
36 of durable assets, housing characteristics, water/sanitation, and toilets facilities. All  
37 estimates were evaluated at the 5% significance level ( $p < 0.05$ ).

38

## 39 **Results**

40 Of the sample, 45.85% had moderate/severe anemia with 9.67( $\pm 0.04$ ) average  
41 hemoglobin (g/dl) concentration. Overweight/obesity was approximately (47%;  
42 overweight 29% vs obesity 18%), short stature (4.77%), and underweight (4.61%) in the  
43 1278 women interviewed. Obesity was highest in the highest income women (26.24%  
44 (69/263)) in whom anemia decreased (34.78%, 80/230) compared to highest prevalence  
45 of anemia in short stature (59.01%, 36/61), underweight (57.62%, 34/59), and overweight  
46 (44.68%, 164/367) women.

47

48 The risk of anemia increased with high parity (adjusted odds ratio; aOR 3.91;  
49 95%CI: 1.79-8.52;  $p = 0.001$ ); lowest income quintile (aOR:2.10; 95%CI: 1.35-3.26;  $p =$   
50 0.001); second income quintile (aOR:1.52; 95%CI: 1.01-2.30  $p = 0.045$ ); being Ewe

51 ethnicity (aOR:2.09; 95%CI: 1.35-3.24; p = 0.001); and Akan (aOR:1.79; 95%CI: 1.16-  
52 2.74; p = 0.008); while obesity reduced the risk (aOR:0.70; 95%CI: 0.50-0.99; p = 0.045).  
53

## 54 **Conclusion**

55 Anemia in pregnancy and overweight, and obesity as double burden of  
56 malnutrition remain significantly high in pregnant South Ghanaian women. The AIP  
57 exceeded the WHO defined threshold and was particularly highest in women having high  
58 parity, short stature, and underweight. While high parity and income status increased  
59 overweight/obesity, obese women were more likely to have a reduced risk of anemia.  
60 However, across the ethnicity, high parity and low-income status posed significant risk  
61 of anemia in women. Further research examining the nexus between underweight or short  
62 stature versus high rates of anemia or overweight/obesity and income and anemia to better  
63 explain, and prevent the increasing trend of anemia in pregnant Ghanaian women is  
64 recommended.

65

66 **Key words:** Women; pregnant; overweight; obesity; income; anemia; hospital; Ghana

## 67 **Introduction**

68 Malnutrition in all its forms is affecting humanity  
69 worldwide. Women in fertility age (WIFA, 15-49 years) are particularly vulnerable to  
70 overweight and obesity (excess BMI of  $\leq 25\text{kg/m}^2$ ) and anemia (low hemoglobin  
71 concentration, Hb of  $\leq 10.9\text{dl}$ ) in pregnancy (AIP). This is widely recognized as the  
72 overlooked paradox of triple burden of malnutrition [1–3]. Researchers posit that because  
73 societies have evolved embracing unhealthy lifestyles in addition to multiple childbearing  
74 practices or short inter-pregnancy intervals, nutritional stores of women often deplete  
75 alongside postpartum weight retention, thereby increasing the chances of  
76 overweight/obesity and AIP [1,4–6]. This often results in bleeding during delivery and  
77 other serious obstetric complications including low birth weight (less than 2.5kg) which  
78 in turn predicts many adult diseases [78].

79  
80 Anemia in pregnancy and excess BMI varies by ethnicity and geographical  
81 locations and is endemic (more than 40%) in most Lower-Middle Income Countries  
82 (LMICs) [3,8–10]. Data from 46 LMICs indicates 40.4% of WIFA is anemic with  
83 pregnant women having 14% increased risk than non-pregnant women whilst those in the  
84 third trimester have 55% increased risk of anemia [3]. This is consistent with the World  
85 Health Organization (WHO) global statistics of anemia in WIFA (40%) and 42% in  
86 children less than 5 years [3]. In contrast, some LMICs such as Ethiopia and Tanzania  
87 reported a moderate level of anemia [11–13].

88  
89 Anemia affects up to 42% of WIFA in Ghana more than the WHO defined 40%  
90 threshold at which mass iron supplementation is recommended in anemia endemic

91 country. This record of anemia prevalence is also more than the global record and is been  
92 consistently high among WIFA across Northern, Middle and Southern zones of Ghana  
93 [3,14,15]. Also in Ghana, this prevalence is much more higher (48%) among adolescents,  
94 whose pregnancy represents 22.1%, 21.1%, and 17% in Southern Ghana (Volta, Central,  
95 and Eastern, the study regions respectively) compared to 14% known nationally, and  
96 pregnant women (45%) [14,15]. Overweight/obesity continues to soar in pregnant women  
97 (nearly 41 to 52% in 2008 and 2014 respectively) and among WIFA, 6% are estimated to  
98 be underweight, and 50% are overweight/obese [9,16,17]. Being overweight or obese  
99 potentially increases risk of iron deficiency (ID) due to low-grade inflammation which in  
100 turn elevates hepcidin production and subsequently, decreases iron efflux into circulation  
101 [2,18]. This reason was not linked to hemoglobin concentration and excess BMI.  
102 Likewise, underweight (BMI of  $< 18.5\text{kg/m}^2$ ) and short maternal stature have been shown  
103 to increase risk of anemia in pregnancy [2,19,20].

104

105 Anemia in pregnancy is associated with nutritional deficiencies, with ID  
106 accounting for 60% of severe and nearly 50% of moderate anemia cases worldwide.<sup>2</sup>  
107 Similarly, in Ghana, ID underlies half of the anemia cases occurring in WIFA [14,16].  
108 AIP is also common when women do not use birth control measures and have high parity,  
109 having life children of 5 or more alongside low-income and educational levels  
110 [5,6,11,15,21–24]. Women with high parity/fertility are most often poor due to the fact  
111 that they have more children to care for and cannot afford higher education with  
112 consequences for unemployment and a higher dependency ratio [11,15,21,23,25]. Thus,  
113 having more children increases household and family size with less opportunity for  
114 education, employment, income, and eventual poor maternal health [11,21,23,24].

115 Frequent childbearing or short interpregnancy intervals increase nutrient  
116 depletion, and this is particularly worse when nutrient inadequacy prolongs in the  
117 reproductive cycle, from conception through pregnancy and parturition [56]. Women  
118 have higher chances of experiencing hemorrhage during childbirth and depleting  
119 nutritional stores over time. Pregnancies result in an increased ID and anemia. Contrarily,  
120 others have retained postpartum weight [26,27].

121

122 Antenatal clinics (ANC) provide a system by which anemia and excess gestational  
123 weight gain as nutritional and birthing problems are addressed [22]. In Ghana, despite  
124 87% of ANC attendees having attended at least four times during pregnancy, addressing  
125 anemia and preventing unhealthy weight gain during pregnancy lag behind ANC  
126 appointments [14–16]. Additionally, women empowerment programs and improvement  
127 in education have had little or no significant impact on childbearing age and parity or  
128 fertility rate. Total fertility in Ghana assessed as number of children *per* woman shows a  
129 medium-fertility level of 3.82 children *per* woman. This is a 1.72 increase above the  
130 required replacement-level fertility (2.1 children/woman) alongside a rising teen  
131 pregnancy rate [14,21,28]. Furthermore, a United Nations population statistics on birth  
132 control measures indicate Ghana is among African countries with low contraceptive use;  
133 median coverage of any method (22.2%), modern method (20.3%), and unmet need  
134 (34%) whilst only 36.2% had demand met [29]. These data are scary as it presupposed  
135 that a higher fertility/parity or a population increase, and associated risks of anemia in the  
136 WIFA population is eminent in Ghana.

137

138 A high parity to high BMI of  $\geq 25\text{kg/m}^2$  association is common and further  
139 enhances risk of anemia in pregnant women. Such evidence is not well documented in  
140 Ghana where the double burden of malnutrition in pregnant women is reportedly high  
141 [9,14,17]. Further, it is unclear whether socioeconomic status, and anthropometric  
142 measures of above or below normal BMI and small maternal stature influences high levels  
143 of anemia in Ghanaian women. This study examined anthropometry – early pregnancy  
144 BMI and maternal stature – and socio-demographic measures as predisposition factors of  
145 AIP in women attending routine antenatal care in Southern Ghana (Central, Eastern, and  
146 Volta regions). This study is vital to know the current trend of AIP from these regions  
147 where the most available National representative data revealed a higher rates of  
148 adolescent pregnancy, a putative risk factor for anemia [14].

149

## 150 **Methodology**

### 151 **Study design, population and sampling technique, sample size**

152 Baseline data involving healthy pregnant women collected through antenatal  
153 attendance from an observational cohort study design conducted between October 2018  
154 and May 2019 was included in this secondary data analysis. Women recruited were aged  
155 15 to 49 years and were between 6 and 42 weeks of gestation. The gestational age was  
156 confirmed based on the reported last menstrual period cum ultrasound scan date [30].

157

158 Women with underlying conditions like Human Immune Deficiency Syndrome  
159 (HIV) or tuberculosis (TB) with potential to compromise nutritional status were excluded  
160 from the study. This was assessed through a review of their ANC booklet and through  
161 direct reported data from physician-diagnosed health conditions that could affect

162 nutritional health. Participants who did not meet this defined criterion were excluded from  
163 the study.

164

165 A multi-stage sampling method was deployed to recruit the participants. The three  
166 regions as well as health facilities – a teaching hospital, three municipal hospitals, and  
167 two polyclinics – were purposely selected based on the documented evidence of  
168 adolescent pregnancy (Volta 22%, Central 21%, and Eastern 17%) [14,15]. This sampling  
169 method is vital to study a larger sample of women in LMICs for the explanation of the  
170 relationship between overweight/obesity and anemia [31]. The present study purposely  
171 included the health institutions for participants recruitment due to the fact that ANC  
172 attendance was high and the availability of medical doctor(s) or midwives with either  
173 basic essential obstetric or comprehensive care (BEmOC/EmOC), or both. This avoided  
174 loss to follow up (in the original study) as women were not referred elsewhere for  
175 delivery, as essential services that would be needed in the time of delivery were available.

176

177 The eligible participants were randomly recruited. Women were asked to pick a  
178 folded piece of paper upon entering the facility with ‘yes’ or ‘no’ written on. Those who  
179 picked ‘yes’ were interviewed after having understood the study procedures and willingly  
180 consented.

181

## 182 **Sample size**

183 A sample size of 1278 was estimated using STATA (Stata Corp LLC [US]) power  
184 analysis command. The study was powered (80%) to detect 1.4 odds of association



185 between maternal MUAC (of less than 23 cm) assuming prevalence (28%) of LBW  
186 infants [32]. There was a 10% adjustment to offset the effect of non-response rate, and as  
187 the minimum obstetric complication to be detected. The baseline data from the study was  
188 re-examined in this analysis to explain the influence of BMI, stature, and socio-  
189 demographic on AIP.

190

## 191 **Data collection**

192 Trained nutrition officers and nurses employed face-to-face interviews and  
193 medical record review (ANC record booklet and attendance registers) to obtain data using  
194 a pre-tested semi-structured questionnaire. The questionnaire was adapted from a  
195 published document and piloted for necessary amendments before field implementation  
196 [14]. This ensured validity and reliability of the data analyzed. This process of data  
197 collection was performed whilst the participants were waiting to attend appointments with  
198 providers/midwives.

199

200 Primary data collected at baseline included economic status, and Hb (g/dl)  
201 concentration measured with a calibrated Hb meter (URIT Medical Electronic Co. Ltd,  
202 D-7, High-tech zone, China) through a standard procedure by laboratory technicians. The  
203 economic status assessment data was consistent with that used by national health surveys  
204 in Ghana and included a) *durable assets*: color television, radio set, refrigerator, mobile  
205 phone, car, or motorbike, gas, or electric stove, washing machine, electricity, computer,  
206 cabinet, internet access, and bed; b) *housing characteristics*: natural floor, cement floor,  
207 tiles, woolen carpet, rubber carpet, and roofing system; c) *water and sanitation*: pipe

208 water, tube well, or borehole, surface water, sachet, or bottled water; and d) *toilet facility*:  
209 flush toilet, pit latrine, no toilet facility, and open defecation [14].

210

211 Retrospective data extracted from maternal and laboratory record books included  
212 maternal age, civil status, education, occupation, ethnicity, gravida, defined as the number  
213 times that a woman has been pregnant, parity, and sickling status. Anthropometric data  
214 of height and weight (kg) before the 20<sup>th</sup> week of gestation was extracted from the records.

215

216 Training and monitoring of data collectors in addition to a field guide developed  
217 following standard protocol all of which allowed quality assurance of data collection and  
218 compliance to specified standards.

219

## 220 **Exposure and outcome variables**

221 AIP was defined as low Hb ( $\leq 10.9$ g/dl) concentration including severe, moderate,  
222 and mild regardless of the gestation age. Those with adequate Hb concentrations of  
223  $\geq 11$ g/dl were classified as non-anemic [33].

224

225 Wealth index was estimated from asset data using Principal Components Analysis  
226 (PCA) method. This index measures inequalities in household characteristics as a proxy  
227 of women's health services usage and eventual outcomes [14]. The binary ('1' as having  
228 the asset and '0' not having the asset) data analyses gave a household wealth index score.  
229 Each household score was ranked into five equal groups, each reflecting 20% of the  
230 population. The resultant wealth quintiles were defined from the lowest to the highest  
231 quintile [14].

232 High parity/fertility level was defined as pregnant women having at least 5 life  
233 children at the time of the interview [23,28].

234

235 Anthropometry data included in this study were maternal stature and early  
236 pregnancy BMI. Maternal stature variable was grouped following standard as very short  
237 (<145 cm), short (145 to <150 cm), average (150 to <155cm), and standard ( $\geq 155$ cm)  
238 [19]. Early pregnancy BMI was computed using maternal weight (kg) before the 20<sup>th</sup>  
239 week of gestation as the baseline weight divided by height in meters square ( $m^2$ ). The  
240 resultant BMI was further categorized into underweight (BMI of <18.5  $kg/m^2$ ), normal  
241 (BMI of 18.5 to 24.9 $kg/m^2$ ), overweight (BMI of 25 to 29.9  $kg/m^2$ ), and obese (BMI of  
242 > 30  $kg/m^2$ ) [34].

243

## 244 **Data management, descriptive and outcome statistics**

245 Data was collated in hard copy, cleaned, and double entered into Epidata software  
246 (version 4.6.0, <http://www.epidata.dk/download.php>, December 3, 2018). This was  
247 exported into STATA (Stata Corp LLC [US]) for analysis. Analyzed data was safely kept  
248 in locked facilities as hard copies and soft copies were password protected.

249

250 Descriptive analysis explored the prevalence of anemia in association with  
251 socioeconomic, maternal stature, and early pregnancy BMI variables as independent risk  
252 factors for AIP. The results were presented as percent distributions of Hb (g/dl)  
253 prevalence, socio-demographic factors, maternal stature, and BMI. The outcome analysis  
254 explored the relationship between the dependent and independent variables. Hb (g/dl)  
255 level was grouped into a binary variable, coded as '1' if the respondent had anemia and

256 ‘0’ if otherwise. Similarly, regarding wealth quintiles, the highest quintile was held as the  
257 reference group and primiparous as reference for the parity level.

258

259 Unadjusted univariable analysis between independent (socio-demographic and  
260 parity characteristics, maternal stature, and BMI) and the outcome/dependent (Hb status)  
261 variable were examined. Logistic regression with a backward selection procedure was  
262 implemented to develop the best fit multivariable model of associations between  
263 independent and the outcome variables. Variables were included in the multivariable  
264 model if loglikelihood ratio test (LRT) p-values were <0.05. Robust standard errors were  
265 calculated, using STATA ‘vce(robust)’ sub-command, to adjust for any correlation of the  
266 model errors due to the sampling procedure, assuming women who visited selected  
267 facilities shared similar covariates. Potential covariates retained in the final model  
268 included age, education, ethnicity, wealth status, gravid, parity, BMI, and Hb (g/dl).

269

## 270 **Ethics consideration**

271 The study was approved by the Research Ethics Committee of the University of  
272 Health and Allied Science, Ghana, with the reference number; UHAS-REC A.2 [7], 18-  
273 19. Each selected health facility granted written permission for use of the study site. Each  
274 eligible woman who willingly volunteered to be involved provided written informed  
275 consent for enrollment after understanding the study details including potential benefits  
276 and harm, data collection procedures, data storage and protection, and anonymity as spelt  
277 out in the participants information sheet.

## 278 **Results**

### 279 **Socioeconomic characteristics and anemia status**

280 **Table 1** describes the background characteristics and anemia status of the  
281 respondents. Participants were  $28.07 \pm 6.37$  years, on average and teenage mothers (15-  
282 19 years) had the highest level of anemia (60.74% (82/135)). However, this consistently  
283 decreased for women aged to 41.82% (87/208) in the 35 and above age group with  
284 evidence of differences within group. Overall, the prevalence of AIP ((Hb  $\leq$  10.9 g/dl)  
285 was 45.85% (586/1278) with an average Hb (g/dl) level of  $9.67 (\pm 0.04)$  in anemic women,  
286 an indication of moderate anemia. Women in the 2<sup>nd</sup> trimester constituted more than half  
287 (55.39% (708/1278)) of the study participants in whom 47.31% (335/708) were anemic.

288

289 The greatest proportions of the women were recruited from the municipal and  
290 teaching hospitals in Volta region (44.91% (574/1278)) with the least being from the  
291 municipal hospital in the Eastern region (14.63% (187/1278)). Anemia was  
292 disproportionally higher in Central (51.45% (266/517)) followed by Volta (46.16%  
293 (265/574)), and Eastern (29.41% (55/187)). Anemia was highest in Akan ethnicity  
294 (47.32% (283/598)), followed by Ewes (46.37% (256/522)) while Ga-Dangme and  
295 Northerners together had the least (36.71 % (47/128)). This was consistent with the study  
296 population pattern; Akan (46.79% (598/1278%), Ewes (43.19% (552/1278)), and the  
297 minority were Ga-Dangme and Northerners (10.01% (128/1278)).

298

299 Low income and primary/no formal educational levels were associated with  
300 increased prevalence of AIP. Of the 1278 women Hb(g/dl) data included in the analyses,  
301 60.40% (151/250) and 49.59% (123/248) of those in the lowest and second income

302 quintile respectively were anemic compared to those in the highest income quintile  
303 (34.22% (90/263)). More than half (54.61% (698/1278)) of the total respondents had  
304 completed junior high school compared to those who had attained a tertiary degree  
305 (12.12% (155/1278)). Those with no formal/primary education had highest level of AIP  
306 (53.33% (106/198)), but the number decreased among those who attained tertiary grade  
307 (31.61% (49/155)). Anemia was highest in women who had no formal jobs (54.90%  
308 (140/255)), followed by farmers (52.17% (36/69)), but this decreased to 34.25% (74/216)  
309 in private/public sector employees.

310

311 More than half (54.38% (695/1278)) of the respondents were primiparous (having  
312 a child for the first time) with around 4% (51/1278) of them in the high parity (having at  
313 least five children) among whom a highest proportion (70.58% (36/51)) were anemic.

314

315 Data on maternal stature shows that those with normal height and anemic were  
316 fewer, meanwhile, the number increased in short stature women (59.01% (36/61)), though  
317 this cohort forms just about 5% (61/1278) of the study population. This dropped by nearly  
318 8% in those within the average height (51.03% (99/194) while declining further by 15%  
319 in those attaining a normal height (44.01% (445/1011)).

320

321 Early pregnancy BMI assessment indicate high levels of overweight/obesity  
322 ((46.7%; 597/1278; overweight (28.71% (367/1278)) vs obesity (17.99% (230/1278)).  
323 Anemia was highest in underweight (57.62% (34/59)) though this cohort represented only  
324 about 5% (59/1278) of the study population. This consistently decreased by 8% in the  
325 normal BMI category (49.51% (308/622) even though this group forms the highest

326 proportion of the interviewees (48.66% (622/1278)). Nearly 13% reduction was evident  
327 in overweight (44.68% (164/367)) compared to almost 23% decline in the obese women  
328 (34.78% (80/230) respectively from the underweight category (**Table 1**). In **Figure 1**  
329 early pregnancy BMI category varies by women's parity level. Obesity increased by  
330 8.78% from 13.95% (97/695) in primiparous women to 22.74% (121/532) in multiparous  
331 (2-3 children/woman) and increased further by 9.58% to 23.53% (12/51) in high parity  
332 women.

333

334 **Fig 1: Percent distribution of early pregnancy BMI by mother's parity\***  
335 (\*Primiparous, n = 695; Multiparous, n = 532; Grand multiparous, n = 51)  
336

337

338 **Table 1. Sociodemographic characteristics and anemia status of antenatal mothers, southern Ghana.**

| Variable                            | Anemia status                                    |                                                |                          | <sup>1</sup> p value |
|-------------------------------------|--------------------------------------------------|------------------------------------------------|--------------------------|----------------------|
|                                     | Not anaemic<br>(Hb ≥ 11 g/dl)<br>n = 692 (54.14) | Anaemic<br>(Hb ≤ 10.9 g/dl)<br>n = 586 (45.85) | Total<br>N = 1278 (100%) |                      |
| <b>Mean (SD) Hb level</b>           | 12.20 (± 0.04)                                   | 9.67 (±0.04)                                   | 11.04 (±1.65)            |                      |
| <b>Age (years, mean SD)</b>         | 28.70 (± 0.22)                                   | 27.33 (± 0.27)                                 | 28.07 (±6.37)            |                      |
| 15-19 Adolescents                   | 53 (39.25)                                       | 82 (60.74)                                     | 135 (10.56)              | 0.001                |
| 20-29 Young adult                   | 318 (53.08)                                      | 281 (46.91)                                    | 599 (46.87)              |                      |
| 30-34 Middle aged adults            | 200 (59.52)                                      | 136 (40.47)                                    | 336 (26.29)              |                      |
| 35 and above Adults                 | 121 (58.17)                                      | 87 (41.82)                                     | 208 (16.27)              |                      |
| <b>Mothers' trimester</b>           |                                                  |                                                |                          | 0.07                 |
| 1 <sup>st</sup> Trimester           | 22 (73.33)                                       | 8 (26.66)                                      | 30 (2.34)                |                      |
| 2 <sup>nd</sup> Trimester           | 373 (52.68)                                      | 335 (47.31)                                    | 708 (55.39)              |                      |
| 3 <sup>rd</sup> Trimester           | 297 (55.00)                                      | 243 (45.00)                                    | 540 (42.25)              |                      |
| <b>Mothers' region of residency</b> |                                                  |                                                |                          | <0.001               |
| Central region                      | 251 (48.54)                                      | 266 (51.45)                                    | 517 (40.45)              |                      |
| Eastern region                      | 132 (70.58)                                      | 55 (29.41)                                     | 187 (14.63)              |                      |
| Volta region                        | 309 (53.83)                                      | 265 (46.16)                                    | 574 (44.91)              |                      |
| <b>Mother's ethnicity</b>           |                                                  |                                                |                          | 0.08                 |
| Akan                                | 315 (52.67)                                      | 283 (47.32)                                    | 598 (46.79)              |                      |
| Ewe                                 | 296 (53.62)                                      | 256 (46.37)                                    | 552 (43.19)              |                      |
| Other (Ga/Northerners)              | 81 (63.28)                                       | 47 (36.71)                                     | 128 (10.01)              |                      |
| <b>Mother's civil status</b>        |                                                  |                                                |                          | 0.010                |
| Married                             | 544 (56.49)                                      | 419 (43.50)                                    | 963 (75.35)              |                      |
| In relationship                     | 105 (45.06)                                      | 128 (54.93)                                    | 233 (18.23)              |                      |
| Never married                       | 39 (52.00)                                       | 36 (48.00)                                     | 75 (5.86)                |                      |
| Divorced/widowed                    | 4 (57.14)                                        | 3 (42.85)                                      | 7 (0.54)                 |                      |



|                                       |             |             |              |        |
|---------------------------------------|-------------|-------------|--------------|--------|
| <b>Mother's educational status</b>    |             |             |              | 0.001  |
| No formal/primary                     | 92 (46.46)  | 106 (53.53) | 198 (15.49)  |        |
| Junior High School                    | 355 (50.85) | 343 (49.14) | 698 (54.61)  |        |
| Senior High School                    | 139 (61.23) | 88 (38.76)  | 227 (17.76)  |        |
| Tertiary                              | 106 (68.38) | 49 (31.61)  | 155 (12.12)  |        |
| <b>Mother's occupation</b>            |             |             |              | <0.001 |
| Artisan                               | 119 (50.63) | 116 (49.36) | 235 (18.38)  |        |
| Farmer                                | 33 (47.82)  | 36 (52.17)  | 69 (5.39)    |        |
| Trading                               | 283 (56.26) | 220 (43.73) | 503 (39.35)  |        |
| Employed (public/private)             | 142 (65.74) | 74 (34.25)  | 216 (16.90)  |        |
| No defined job                        | 115 (45.09) | 140 (54.90) | 255 (19.95)  |        |
| <b>Gravida of the mother</b>          |             |             |              | 0.002  |
| 1 <sup>st</sup> Pregnancy             | 148 (46.39) | 171 (53.60) | 319 (24.96)  |        |
| 2-4 <sup>th</sup> Pregnancy           | 442 (57.92) | 321 (42.07) | 763 (59.70)  |        |
| ≥ 5 <sup>th</sup> Pregnancies         | 102 (52.04) | 94 (47.95)  | 196 (15.33)  |        |
| <b>Parity of the mother</b>           |             |             |              | <0.001 |
| Primiparous (1 <sup>st</sup> child)   | 366 (52.66) | 329 (47.33) | 695 (54.38)  |        |
| Multiparous (2-4 <sup>th</sup> child) | 311 (58.45) | 221 (41.54) | 532 (41.62)  |        |
| Grand multiparous (≥ 5 children)      | 15 (29.41)  | 36 (70.58)  | 51 (3.99)    |        |
| <b>Wealth quintiles</b>               |             |             |              | <0.001 |
| Lowest                                | 99 (39.60)  | 151 (60.40) | 250 (19.56)  |        |
| Second                                | 125 (50.40) | 123 (49.59) | 248 (19.40)  |        |
| Middle                                | 140 (54.68) | 116 (45.31) | 256 (20.03)  |        |
| Fourth                                | 155 (59.38) | 106 (40.61) | 261 (20.42)  |        |
| Highest                               | 173 (65.77) | 90 (34.22)  | 263 (20.57)  |        |
| <b>Sickle cell anemia</b>             |             |             |              |        |
| Positive                              | 15 (50.00)  | 15 (50.00)  | 30 (2.34)    |        |
| Negative                              | 677 (54.24) | 571 (45.75) | 1248 (97.65) |        |

|                                                    |             |             |              |        |
|----------------------------------------------------|-------------|-------------|--------------|--------|
| <b>Maternal stature (cm)</b>                       |             |             |              | 0.05   |
| Very short (< 145 cm)                              | 6 (50.00)   | 6 (50.00)   | 12 (0.93)    |        |
| Short (145 to < 150 cm)                            | 25 (40.98)  | 36 (59.01)  | 61 (4.77)    |        |
| Average (150 to < 155 cm)                          | 95 (48.96)  | 99 (51.03)  | 194 (15.17)  |        |
| Normal ( $\geq$ 155 cm)                            | 566 (55.98) | 445 (44.01) | 1011 (79.10) |        |
| <b>Mothers' pre-pregnancy BMI</b>                  |             |             |              | <0.001 |
| Undernutrition (< 18.5 kg/m <sup>2</sup> )         | 25 (42.37)  | 34 (57.62)  | 59 (4.61)    |        |
| Normal ( $\geq$ 18.5.0 to 24.9 kg/m <sup>2</sup> ) | 314 (50.48) | 308 (49.51) | 622 (48.66)  |        |
| Overweight ( $\geq$ 25 to 29.9 kg/m <sup>2</sup> ) | 203 (55.31) | 164 (44.68) | 367 (28.71)  |        |
| Obese ( $\geq$ 30 kg/m <sup>2</sup> )              | 150 (65.21) | 80 (34.78)  | 230 (17.99)  |        |

339 N: total sample; n: sub-sample size; Hb: haemoglobin; g/dl: grams *per* deciliter; SD: standard deviation;  $\geq$ : greater than or equal to; %: per  
340 cent; BMI: body mass index; kg/m<sup>2</sup>: kilogram per meter square; cm: centimetre; <sup>1</sup>Pearson's chi square test.

341 **Figure 2** reveals that early pregnancy BMI category varied by women's income  
342 level. Healthy weight gain was highest (63.6% (159/250)) in the lowest income women,  
343 but this decreased by nearly 24% to 39.92% (105/263) in the highest income women in  
344 whom obesity was highest (26.24% (69/263)). Obesity was lowest (9.20%, 23/250)) in  
345 the lowest income women. So, the wealthier the women were the higher the rates of  
346 excess BMI and vice-versa.

347  
348 **Fig 2: Percent distribution of early pregnancy BMI by mother's income level\***  
349 (\*Lowest, n = 250; Second, n = 248; Middle, n = 256; Fourth, n = 261; Highest, n = 263)  
350

351

## 352 **Results of anemia in pregnancy and associated risk factors**

353 **Table 2** outlines the odds ratio (OR) and adjusted odds ratio (aOR) of factors  
354 associated with AIP. Being from an Ewe ethnicity was associated with high risk of anemia  
355 (OR = 1.49; 95% CI: 1.00 to 2.21; p = 0.048) and (aOR = 2.09; 95% CI: 1.35 to 3.24; p  
356 = 0.001), and (OR = 1.54, 95% CI: 1.04 to 2.29; p = 0.029), and (aOR = 1.79; 95% CI:  
357 1.16 to 2.74; p = 0.008) if an Akan ethnicity.

358

359 The risk of anemia was highest in the high parity (5 children/women) (OR = 2.66;  
360 95% CI: 1.43 to 4.96; p = 0.002) and (aOR = 3.91; 95% CI: 1.79 to 8.52; p = 0.001).  
361 Surprisingly, being obese was associated with 46% reduced risk of anemia (OR = 0.54;  
362 95% CI: 0.39 to 0.74; p < 0.001) and 30% reduced risk (aOR = 0.70; 95% CI: 0.50 to  
363 0.99; p = 0.045).

364

365 Whereas, neither gravida, education, or occupation showed no impact on AIP, the  
366 risk of AIP was highest, nearly 3 times (OR = 2.93; 95% CI: 2.04 to 4.19, p < 0.001) and

367 aOR of 2.1 times (aOR = 2.10; 95% CI: 1.35 to 3.26; p = 0.001) among women in the  
368 lowest income quintile. Similarly, the second quintile group had (OR = 1.89, 95% CI:  
369 1.32 to 2.70; p < 0.001) and (aOR = 1.52; 95% CI: 1.01 to 2.30; p = 0.045) risk of  
370 becoming anemic. The risk significantly disappeared as the women wealth status  
371 improved in the middle, fourth and the highest quintile.

372

373

374 **Table 2. Logistic regression of socio-demographic characteristics and anemia status of antenatal mothers, southern Ghana.**

| Variable                                    | Anemia status                                        |                                                 | Unadjusted and Adjusted odds ratio |                  |                          |         |
|---------------------------------------------|------------------------------------------------------|-------------------------------------------------|------------------------------------|------------------|--------------------------|---------|
|                                             | Not anaemic<br>(Hb ≥ 11 g/dl)<br>n = 692<br>(54.14%) | Anaemic<br>(Hb < 11.0 g/dl)<br>n = 586 (45. 8%) | Unadjusted<br>OR (95% CI)          | P-value          | Adjusted<br>aOR (95% CI) | P-value |
| <b>Age (years, mean SD; 28.04 (± 6.38))</b> |                                                      |                                                 |                                    | <b>&lt;0.001</b> |                          |         |
| 15-19 Adolescents                           | 53 (39.25)                                           | 82 (60.74)                                      | 1.75 (1.19, 2.56)                  | 0.004            | 1.16 (0.71, 1.90)        | 0.547   |
| 20-29 Young adult                           | 318 (53.08)                                          | 281 (46.91)                                     | Reference                          |                  | Reference                |         |
| 30-34 Middle aged adults                    | 200 (59.52)                                          | 136 (40.47)                                     | 0.76 (0.58, 1.00)                  | 0.058            | 0.88 (0.64, 1.20)        | 0.417   |
| 35 and above Adults                         | 121 (58.17)                                          | 87 (41.82)                                      | 0.81 (0.58, 1.11)                  | 0.205            | 0.76 (0.51, 1.13)        | 0.185   |
| <b>Mother's ethnicity</b>                   |                                                      |                                                 |                                    | <b>0.08</b>      |                          |         |
| Akan                                        | 315 (52.67)                                          | 283 (47.32)                                     | 1.54 (1.04, 2.29)                  | 0.029            | 1.79 (1.16, 2.74)        | 0.008   |
| Ewe                                         | 296 (53.62)                                          | 256 (46.37)                                     | 1.49 (1.00, 2.21)                  | 0.048            | 2.09 (1.35, 3.24)        | 0.001   |
| Other (Ga/Northerners)                      | 81 (63.28)                                           | 47 (36.71)                                      | Reference                          |                  | Reference                |         |
| <b>Mother's educational status</b>          |                                                      |                                                 |                                    | <b>&lt;0.001</b> |                          |         |
| No formal/primary                           | 92 (46.46)                                           | 106 (53.53)                                     | 2.49 (1.60, 3.86)                  | <0.001           | 1.66 (0.92, 3.02)        | 0.091   |
| Junior High School                          | 355 (50.85)                                          | 343 (49.14)                                     | 2.09 (1.44, 3.02)                  | <0.001           | 1.40 (0.83, 2.37)        | 0.197   |
| Senior High School                          | 139 (61.23)                                          | 88 (38.76)                                      | 1.36 (0.88, 2.10)                  | 0.153            | 1.06 (0.63, 1.78)        | 0.819   |
| Tertiary                                    | 106 (68.38)                                          | 49 (31.61)                                      | Reference                          |                  | Reference                |         |
| <b>Mother's civil status</b>                |                                                      |                                                 |                                    | 0.01             |                          |         |
| Married                                     | 544 (56.49)                                          | 419 (43.50)                                     | Reference                          |                  | Reference                |         |
| In relationship                             | 105 (45.06)                                          | 128 (54.93)                                     | 1.58 (1.18, 2.11)                  | 0.002            | 1.01 (0.71, 1.42)        | 0.955   |
| Never married                               | 39 (52.00)                                           | 36 (48.00)                                      | 1.19 (0.74, 1.37)                  | 0.451            | 0.79 (0.45, 1.37)        | 0.406   |
| Divorced/widowed                            | 4 (57.14)                                            | 3 (42.85)                                       | 0.97 (0.21, 4.37)                  | 0.972            | 0.96 (0.20, 4.63)        | 0.969   |
| <b>Mother's occupation</b>                  |                                                      |                                                 |                                    | <0.001           |                          |         |
| Artisan                                     | 119 (50.63)                                          | 116 (49.36)                                     | Reference                          |                  |                          |         |
| Farmer                                      | 33 (47.82)                                           | 36 (52.17)                                      | 1.11(0.65, 1.91)                   | 0.68             | 0.74 (0.41, 1.35)        | 0.333   |

|                                              |             |             |                   |                  |                   |       |
|----------------------------------------------|-------------|-------------|-------------------|------------------|-------------------|-------|
| Trading                                      | 283 (56.26) | 220 (43.73) | 0.79 (0.58, 1.08) | 0.153            | 0.83 (0.60, 1.16) | 0.288 |
| Employed (public/private)                    | 142 (65.74) | 74 (34.25)  | 0.53 (0.36, 0.78) | 0.001            | 0.83 (0.51, 1.34) | 0.458 |
| No defined job                               | 115 (45.09) | 140 (54.90) | 1.24 (0.87, 1.78) | 0.22             | 1.02 (0.66, 1.56) | 0.922 |
| <b>Gravida of the mother</b>                 |             |             |                   | 0.002            |                   |       |
| 1 <sup>st</sup> Pregnancy                    | 148 (46.39) | 171 (53.60) | Reference         |                  | Reference         |       |
| 2-4 <sup>th</sup> Pregnancy                  | 442 (57.92) | 321 (42.07) | 0.62 (0.48, 0.81) | 0.001            | 0.79 (0.56, 1.12) | 0.199 |
| ≥5 Pregnancy                                 | 102 (52.04) | 94 (47.95)  | 0.79 (0.55, 1.13) | 0.214            | 0.76 (0.44, 1.32) | 0.345 |
| <b>Parity of the mother</b>                  |             |             |                   | <b>&lt;0.001</b> |                   |       |
| Primiparous (1 <sup>st</sup> child)          | 366 (52.66) | 329 (47.33) | Reference         |                  | Reference         |       |
| Multiparous (2-4 <sup>th</sup> child)        | 311 (58.45) | 221 (41.54) | 0.79 (0.62, 0.99) | 0.043            | 0.97 (0.71, 1.33) | 0.897 |
| Grand multiparous (≥ 5 children)             | 15 (29.41)  | 36 (70.58)  | 2.66 (1.43, 4.96) | 0.002            | 3.91 (1.79, 8.52) | 0.001 |
| <b>Wealth quintiles</b>                      |             |             |                   | <b>&lt;0.001</b> |                   |       |
| Lowest                                       | 99 (39.60)  | 151 (60.40) | 2.93 (2.04, 4.19) | <0.001           | 2.10 (1.35, 3.26) | 0.001 |
| Second                                       | 125 (84.45) | 123 (83.10) | 1.89 (1.32, 2.70) | <0.001           | 1.52 (1.01, 2.30) | 0.045 |
| Middle                                       | 140 (54.68) | 116 (45.31) | 1.59 (1.11, 2.26) | 0.010            | 1.27 (0.85, 1.89) | 0.225 |
| Fourth                                       | 155 (59.38) | 106 (40.61) | 1.31 (0.92, 1.87) | 0.131            | 1.09 (0.74, 1.61) | 0.632 |
| Highest                                      | 173 (65.77) | 90 (34.22)  | Reference         |                  | Reference         |       |
| <b>Mothers' BMI (kg/m<sup>2</sup>)</b>       |             |             |                   | <b>0.004</b>     |                   |       |
| Undernutrition (< 18.5 kg/m <sup>2</sup> )   | 25 (42.37)  | 34 (57.62)  | 1.38 (0.80, 2.37) | 0.235            | 1.31 (0.74, 2.32) | 0.343 |
| Normal (≥18.5.0 to 24.9 kg/m <sup>2</sup> )  | 314 (50.48) | 308 (49.51) | Reference         |                  | Reference         |       |
| Overweight (≥ 25 to 29.9 kg/m <sup>2</sup> ) | 203 (55.31) | 164 (44.68) | 0.82 (0.63, 1.06) | 0.142            | 0.97 (0.73, 1.28) | 0.779 |
| Obese (≥ 30 kg/m <sup>2</sup> )              | 150 (65.21) | 80 (34.78)  | 0.54 (0.39, 0.74) | <0.001           | 0.70 (0.50, 0.99) | 0.045 |

375 N: total sample; n: sub-sample size; Hb: haemoglobin; g/dl: grams per deciliter; SD: standard deviation; ≥: greater than, or equal to; ≤: less  
376 than, or equal to; %: per cent; CI: confidence interval; BMI: body mass index; kg/m<sup>2</sup>: kilogram *per* meter square

377

378

## 379 Discussion

380 High proportion of pregnant women interviewed at routine antenatal care in the selected  
381 regions of Southern Ghana were anemic and overweight, and obese reflecting the growing  
382 double burden of malnutrition in this population group. Statistics across the world indicate  
383 pregnant women or WIFA (15-49 years) are either anemic or overweight and obese, or both  
384 [1]. Most significantly, the anemia recorded was higher, than the WHO defined 40% threshold  
385 [8,14,15]. The present findings uniquely identified anemia as a micronutrient deficiency  
386 increasingly trending on a par with macronutrient malnutrition [4,15]. This is consistent with  
387 National surveys. In particular, the Ghana Demographic Health Survey data revealed a higher  
388 burden of maternal malnutrition, varying substantially by individual nutritional status,  
389 economic status, parity, and ethnicity [14,35,36]. These are paradoxically linked predisposition  
390 factors of malnutrition common to LMICs [1,4,37].

391  
392 Anemia was significantly more common in high parity and low (lowest and second  
393 quintile) income women groups in whom close to two-third and more than half respectively  
394 had healthy weight (BMI of 18.5 to 24.9kg/m<sup>2</sup>) than highest income women among whom  
395 obesity increased. While overweight and obesity increased positively with increasing parity  
396 and high-income level, there was an inverse relationship between obesity and the rate of  
397 anemia. The high parity being proportionate to high level of anemia and overweight/obesity  
398 enhances the fact that child bearing practices increase nutrient depletion as well as promote  
399 blood losses and postpartum weight retention [5,6,11,23,26,27,38]. Though statistically  
400 insignificant, AIP was highest in short stature (145≤155cm) and underweight (BMI  
401 <18.5kg/m<sup>2</sup>) women than their counterparts of healthy weight (BMI of 18.5 to 24.9kg/m<sup>2</sup>) and  
402 compares with evidence, especially from rural India and the Maldives [2,20,39].

403





428 Evidently, having at least 5 children/women increase overweight/obesity risk and  
429 independently, predisposed women to nearly four-fold risk of anemia in this study. Though the  
430 number of women in this cohort was small (about 4%), the finding is similar to that of a study  
431 in Oman where approximately half of the women studied had high parity with a significantly  
432 higher incidence of AIP [23]. The same risk was not evident when analyzed according to the  
433 number of pregnancies, not live births in this study. Short interpregnancy interval, or high  
434 parity/fertility depletes nutrition reserves and thus, predisposes women to a higher risk of  
435 anemia [5,6,11]. Of note, while age at pregnancy had no significant relation with AIP in this  
436 study, the findings support evidence that increase childbearing influences nutrient depletions,  
437 a putative risk factor for anemia in the reproductive cycle [5,6,23].

438

439 The result also exemplified anemia as a condition of the poor and overweight/obesity  
440 as conditions of the affluents. Whereas, poverty was inversely associated with  
441 overweight/obesity in women, poverty and high parity were positively associated with  
442 increased risk of anemia. Evidently, when women's economic status improved, the risk of  
443 anemia being more likely decreases while overweight and obesity increased. In other words,  
444 women in the lowest and second quintiles were more likely to have anemia than their  
445 counterparts in the highest income quintiles, but not overweight/obesity. It could be speculated  
446 that poorer women are more likely to have many children, which may push them into poverty  
447 and thereby they may be unable to afford healthy diets to prevent AIP. Indeed, having 5 or  
448 more children predisposed women to low income (poverty) and anemia, but not overweight  
449 and obesity in this study. Studies in part of Asia and Eastern Africa demonstrated that a lower  
450 average monthly income and high parity were vital modifiable risk factors for rising levels of  
451 AIP [12,43,44]. Conversely, birth control strategies and education reduced the risk of AIP  
452 [44,45]. These results underscore the significance of improving individuals or household

453 income status whilst maintaining a replacement-fertility level, particularly among the poor, as  
454 recommended in other studies [8,10,11,21,44,45].

455

456 The direct association between high parity, poverty, and increased likelihood of AIP  
457 found in the present study was associated with frequent birthing experiences in other literatures  
458 [45]. For instance, whereas Oman reported a higher incidence of AIP in high parity women,  
459 analysis of Myanmar's first Demographic and Health Survey data revealed elevated risks of  
460 AIP prevalence [46]. Understandably, high parity women have higher chances of experiencing  
461 hemorrhage during childbirth due to malnourishment associated with frequent pregnancies or  
462 short interpregnancy intervals [5,6,23]. Another plausible reason could be that having more  
463 children increases household/family size, which may result in women being unable to get  
464 adequate nutrition, thus explaining the apparent different risk for anemia in relation to the  
465 number of pregnancies, compared to live births and also the low income suggested in the  
466 present study.

467

468 A larger proportion of pregnant adolescents were anemic compared to the adults  
469 however the results were not statistically significant. This finding seems to contrast the findings  
470 that high parity, a factor associated with age, increases the risk of AIP [5,6,23,46]. Indeed, the  
471 result demonstrated that high parity resulted in an increased odd of AIP, but not in association  
472 with adulthood. The higher proportion of AIP in the adolescents could be attributed to their  
473 inability to meet daily nutrient requirements prior to pregnancy and thereby unable to meet the  
474 increased nutritional demand in pregnancy [15]. This may be due to the inability to sustain iron  
475 and hemoglobin levels during menstruation in adolescence.

476

477 Ethnicity was an unmodifiable risk factor for overweight/obesity and anemia in  
478 pregnant women across the study regions. The residents of the Central region, most of whom  
479 were of the Akan ethnic origin, had the highest proportion of AIP consistent with a recent study  
480 in the region [47]. The Ewes who are predominantly domiciled in the Volta region came second  
481 following Central regional record of anemia. However, women from Volta had the highest  
482 odds – twice the risk – of AIP among the ethnics compared to Akans who had about 1.8 times  
483 risk. However, obesity was higher (nearly one-fifth) in Central and Eastern respectively  
484 compared with about one-sixth in Volta (figure not shown). These levels of obesity and anemia  
485 in Volta region cast doubt that obesity reduces anemia risk. Nonetheless, elsewhere, in Saudi  
486 Arabia obese pregnant women, about three-fifths were anemic [48], whereas analysis of a  
487 National data from Ghana indicated below 10% co-occurrence of overweight/obesity and  
488 anemia in WIFA, [36] but more than half were shown to have co-occurrence of overweight and  
489 anemia [35].

490

491 The regional and ethnic variations in anemia and overweight/obesity found in Southern  
492 Ghana corroborate previous studies in the Middle and Northern parts of the country [8–10].  
493 Elsewhere, secondary analysis of the Colombian National Nutrition Survey (ENSIN) 2010 data  
494 elucidated similar associations of high levels of AIP across geographic groups/ethnicities [49].  
495 However, developing country like Ethiopia and Tanzania reported a moderate level of anemia  
496 in women whilst some high-income countries such as New Zealand, Australia, England, and  
497 Ireland, reported below three percent prevalence [11–13].

498

499 The established burden of anemia and overweight, and obesity in pregnant South  
500 Ghanaian women enhances the WHO recommendation for increase ANC attendance where  
501 women anthropometry, dietary counselling, and socioeconomic measurements are assessed

502 before delivery [22]. And whereas obesity seems protective against AIP in this study in support  
503 of other studies, but contrarily to many other findings, it is important to deploy alternative  
504 diagnostic methods to further explain the rising trend of overweight/obesity and anemia and  
505 the causes in Ghanaian women [2,18,50]. For instance, measuring ID including detecting  
506 inflammation is supported in a WHO guideline where ferritin concentration is recommended  
507 for iron status assessment [50]. A review of overweight/obesity and risk of ID/anemia by  
508 Wawer et al. corroborates the WHO's guideline [2]. Mwangi and colleagues have, however,  
509 cited uncertainties in the use of zinc protoporphyrin (ZPP) in addition to Hb concentration to  
510 define AIP [51]. Regardless of the findings, a further review has advocated for its use [51].

511

## 512 **Limitations and strengths**

513 Cause and effect relationships are hard to determine since the data were drawn from an  
514 observational cohort study baseline data. Dietary habits and preventive services like iron  
515 supplementation, helminths, and infection prevention during pregnancy which are important  
516 risk factors were not studied, hence misclassification bias is likely. Further, the analysis also  
517 included baseline data of Hb(g/dl) concentration measurement that has several limitations in  
518 anemia estimation than iron status (for example, serum ferritin) assessment [50]. Additionally,  
519 the regions and the health facilities were conveniently selected and no urban-rural segregation  
520 could potentially bias the results. However, the method was recommended as necessary for  
521 LMICs [31].

522

523 Consequently, the researcher has made cautious interpretations of the results and deployed  
524 anthropometry data to determine nutritional effect on maternal anemia. The study also  
525 enhanced the reliability of data through the use of a validated tool by skilled professionals who  
526 had training on the study method and were provided with standard references for data

527 collection. In addition, field investigators had assigned supervisors knowledgeable in  
528 nutritional and health surveys.

529

## 530 **Conclusion**

531 Anemia in pregnancy and overweight, and obesity as a double burden of malnutrition  
532 remains significantly high in pregnant South Ghanaian women. The AIP exceeded the WHO  
533 defined threshold as a significant public health threat and was particularly highest in women  
534 having high parity, short stature, and underweight. While high parity and income status  
535 increased overweight/obesity, obese women were more likely to have a reduced risk of anemia.  
536 However, across the ethnicity, high parity and low-income status posed significant risk of  
537 anemia in women. As women with an improved income status were more likely at risk of  
538 overweight/obesity but less anemic, public health nutrition recommendations should focus on  
539 targeting these higher income women to ensure they focus on more healthy diets and physical  
540 activity to reduce excess BMI.

541

## 542 **Acknowledgments**

543 The authors would like to acknowledge the following individuals and organizations for  
544 their role(s): Japanese Government, staff of Japanese Grant Aid for Human Resource  
545 Development, and Japan International Cooperation Agency (JICA) for funding my studies in  
546 Japan. Nagasaki University School of Tropical Medicine and Global Health (TMGH), Japan,  
547 for Student Research Support provided. Management and staff of various health facilities  
548 where the study was conducted. All field supervisors and research assistants whose  
549 contributions ensured collection of data.

550 Shafiq Siita, National Health Insurance, Upper East Regional Office, Ghana, for guidance on  
551 data management.

## 552 **Author contributions**

553 Study conception TKA, MM, BE, FBZ, preliminary analysis and graphics TKA, MM,  
554 drafting the manuscript TKA, preparing results tables MM, manuscript critical review and  
555 finalization of manuscript for submission BE, FBZ.

## 556 **Funding statement**

557 No specific funding was received for this study.  
558

## 559 **Competing interests**

560 None declared.  
561  
562

## 563 **References**

- 564 1. Launbo N, Davidsen E, Granich-Armenta A, et al. The overlooked paradox of the  
565 coexistence of overweight/obesity and anemia during pregnancy. *Nutrition*. 2022;99-  
566 100. doi:10.1016/j.nut.2022.111650
- 567 2. Wawer AA, Hodyl NA, Fairweather-tait S, Froessler B. Are pregnant women who are  
568 living with overweight or obesity at greater risk of developing iron deficiency/anaemia ?  
569 *Nutrients*. 2021;13,(1572). doi:https://doi.org/10.3390/nu13051572
- 570 3. Sun J, Wu H, Zhao M, Magnussen CG, Xi B. Prevalence and changes of anemia among  
571 young children and women in 47 low- and middle-income countries, 2000-2018.  
572 *eClinicalMedicine*. 2021;41. doi:10.1016/j.eclinm.2021.101136
- 573 4. WHO. *The Double Burden of Malnutrition. Policy Brief*. Vol 21.; 2017.  
574 doi:10.1111/j.1745-6584.1983.tb00740.x
- 575 5. Winkvist A, Rasmussen KM, Jean-Pierre Habicht. A New definition of maternal  
576 depletion syndrome. *Am J Public Heal*. Published online 1992:691-694.
- 577 6. King JC. The risk of maternal nutritional depletion and poor outcomes increases in early  
578 or closely spaced pregnancies. *J Nutr*. 2003;133(5 SUPPL. 1):1732-1736.  
579 doi:10.1093/jn/133.5.1732s
- 580 7. Figueiredo ACMG, Gomes-Filho IS, Batista JET, et al. Maternal anemia and birth  
581 weight: A prospective cohort study. *PLoS One*. 2019;14(3):e0212817.  
582 doi:10.1371/journal.pone.0212817
- 583 8. Ayensu J, Annan R, Lutterodt H, Edusei A, Peng LS. Prevalence of anaemia and low  
584 intake of dietary nutrients in pregnant women living in rural and urban areas in the  
585 Ashanti region of Ghana. *PLoS One*. 2020;15(1):1-15.  
586 doi:10.1371/journal.pone.0226026
- 587 9. Ofori-asenso R, Agyeman AA, Laar A, Boateng D. Overweight and obesity epidemic  
588 in Ghana — a systematic review and meta-analysis. *BMC Public Health*. Published  
589 online 2016. doi:10.1186/s12889-016-3901-4
- 590 10. Ahenkorah B, Nsiah K, Baffoe P. Sociodemographic and Obstetric Characteristics of

- 591 Anaemic Pregnant Women Attending Antenatal Clinic in Bolgatanga Regional  
592 Hospital. *Scientifica (Cairo)*. 2016;2016:13-16. doi:10.1155/2016/4687342
- 593 11. Bekele A, Tilahun M, Mekuria A. Prevalence of Anemia and Its Associated Factors  
594 among Pregnant Women Attending Antenatal Care in Health Institutions of Arba Minch  
595 Town, Gamo Gofa Zone, Ethiopia: A Cross-Sectional Study. *Anemia*. 2016;2016:1-9.  
596 doi:10.1155/2016/1073192
- 597 12. Stephen G, Mgongo M, Hussein Hashim T, Katanga J, Stray-Pedersen B, Msuya SE.  
598 Anaemia in Pregnancy: Prevalence, Risk Factors, and Adverse Perinatal Outcomes in  
599 Northern Tanzania. *Anemia*. 2018;2018. doi:10.1155/2018/1846280
- 600 13. Masukume G, Khashan AS, Kenny LC, Baker PN, Nelson G. Risk factors and birth  
601 outcomes of anaemia in early pregnancy in a nulliparous cohort. *PLoS One*.  
602 2015;10(4):1-15. doi:10.1371/journal.pone.0122729
- 603 14. GSS GHS and ICF International. *Ghana Demographic and Health Survey 2014.*; 2015.  
604 15. WHO. *Guideline: Daily Iron Supplementation in Adult Women and Adolescent Girls.*;  
605 2016.
- 606 16. University of Ghana, GroundWork, University of Wisconsin-Madison, KEMRI-  
607 Wellcome Trust U. *Ghana Micronutrient Survey 2017.*; 2017.
- 608 17. Ghana Statistical Service Ghana Health Service (GSS) ICF and International. *Ghana*  
609 *Demographic and Health Survey 2009. Accra, Ghana: GSS, GHS, and ICF Macro.*;  
610 2009.
- 611 18. Bodnar LM, Siega-Riz AM, Cogswell ME. High prepregnancy BMI increases the risk  
612 of postpartum anemia. *Obes Res*. 2004;12(6):941-948. doi:10.1038/oby.2004.115
- 613 19. Kozuki N, Katz J, Lee ACC, et al. Short maternal stature increases risk of small for-  
614 gestational-age and preterm births in low and middle-income countries: Individual  
615 participant data meta-analysis and population attributable fraction. *J Nutr*.  
616 2015;145(11):2542-2550. doi:10.3945/jn.115.216374
- 617 20. Patel A, Prakash AA, Das PK, Gupta S, Pusdekar YV, Hibberd PL. Maternal anemia  
618 and underweight as determinants of pregnancy outcomes: Cohort study in eastern rural  
619 Maharashtra, India. *BMJ Open*. 2018;8(8):1-15. doi:10.1136/bmjopen-2018-021623
- 620 21. Bhasin VK, Obeng C, Bentum-ennin I. Fertility , Income and Poverty of Households in  
621 Ghana. *ResearchGate*. Published online 2014.  
622 <https://www.researchgate.net/publication/228416821>
- 623 22. WHO. *WHO Recommendations on Antenatal Care for a Positive Pregnancy*  
624 *Experience.*; 2016. <http://www.who.int>
- 625 23. Al-Farsi YM, Brooks DR, Werler MM, Cabral HJ, Al-Shafei MA, Wallenburg HC.  
626 Effect of high parity on occurrence of anemia in pregnancy: A cohort study. *BMC*  
627 *Pregnancy Childbirth*. 2011;11(1):7. doi:10.1186/1471-2393-11-7
- 628 24. Cohen AK, Kazi C, Headen I, et al. Educational attainment and gestational weight gain  
629 among US mothers. 2017;26(4):460-467. doi:10.1016/j.whi.2016.05.009.Educational
- 630 25. Eggersdofer M, Kraemer K, Ruel M, et al. The road to good nutrition: A global  
631 perspective. In: Eggersdofer M, Kraemer K, Ruel M, et al., eds. Karger; 2013:27-30.
- 632 26. Zoet GA, Paauw ND, Groenhof K, et al. Association between parity and persistent  
633 weight gain at age 40-60 years: A longitudinal prospective cohort study. *BMJ Open*.  
634 2019;9(5):1-8. doi:10.1136/bmjopen-2018-024279
- 635 27. Abrams B, Heggeseth B, Rehkopf D, Davis E. Parity and body mass index in US  
636 women: A prospective 25-year study. *Obesity*. 2013;21(8):1514-1518.  
637 doi:10.1002/oby.20503
- 638 28. United Nations Department of Economic Affairs Population Division. *World*  
639 *Population Prospects: The 2006 Revision*. Vol I. United Nations; 2007.
- 640 29. United Nations Department of Economic Affairs Population Devison 2015. *Trends in*

- 641 *Contraceptive Use Worldwide 2015*. United Nations; 2015. doi:10.18356/f52491f9-en  
642 30. Acharya O, Zotor FB, Chaudhary P, Deepak K, Amuna P, Ellahi B. Maternal Nutritional  
643 Status, Food Intake and Pregnancy Weight Gain in Nepal. *J Health Manag.*  
644 2016;18(1):1-12. doi:10.1177/0972063415625537  
645 31. Fanou-Fogny N, J. Saronga N, Koreissi Y, A. M. Dossa R, Melse-Boonstra A, D.  
646 Brouwer I. Weight status and iron deficiency among urban Malian women of  
647 reproductive age. *Br J Nutr.* 2011;105(4):574-579. doi:10.1017/S0007114510003776  
648 32. Assefa N, Berhane Y, Worku A. Wealth Status, Mid Upper Arm Circumference  
649 (MUAC) and Antenatal Care (ANC) Are Determinants for Low Birth Weight in Kersa,  
650 Ethiopia. *PLoS One.* 2012;7(6). doi:10.1371/journal.pone.0039957  
651 33. WHO. Haemoglobin concentrations for the diagnosis of anaemia and assessment of  
652 severity. *Geneva, Switz World Heal Organ.* Published online 2011:1-6. doi:2011  
653 34. WHO. *Physical Status: The Use and Interpretation of Anthropometry*. Vol 1995.; 1995.  
654 35. Kushitor SB, Owusu L, Kushitor MK. The prevalence and correlates of the double  
655 burden of malnutrition among women in Ghana. *PLoS One.* 2020;15(12):1-12.  
656 doi:10.1371/journal.pone.0244362  
657 36. Christian AK, Steiner-Asiedu M, Bentil HJ, et al. Co-Occurrence of  
658 Overweight/Obesity, Anemia and Micronutrient Deficiencies among Non-Pregnant  
659 Women of Reproductive Age in Ghana: Results from a Nationally Representative  
660 Survey. *Nutrients.* 2022;14(7). doi:10.3390/nu14071427  
661 37. Cepeda-Lopez AC, Baye K. Obesity, iron deficiency and anaemia: A complex  
662 relationship. *Public Health Nutr.* 2022;23(10):1703-1704.  
663 doi:10.1017/S1368980019004981  
664 38. Taghdir M, Alimohamadi Y, Sepandi M, Rezaianzadeh A, Abbaszadeh S, Mahmud FM.  
665 Association between parity and obesity: A cross sectional study on 6,447 Iranian  
666 females. *J Prev Med Hyg.* 2020;61(3):E476-E481. doi:10.15167/2421-  
667 4248/jpmh2020.61.3.1430  
668 39. Rahman MA, Rahman MS, Aziz Rahman M, Szymlek-Gay EA, Uddin R, Islam SMS.  
669 Prevalence of and factors associated with anaemia in women of reproductive age in  
670 Bangladesh, Maldives and Nepal: Evidence from nationally-representative survey data.  
671 *PLoS One.* 2021;16(1):e0245335. doi:10.1371/journal.pone.0245335  
672 40. Ausk KJ, Ioannou GN. Is obesity associated with anemia of chronic disease? A  
673 population-based study. *Obesity.* 2008;16(10):2356-2361. doi:10.1038/oby.2008.353  
674 41. Qin Y, Melse-Boonstra A, Pan X, et al. Anemia in relation to body mass index and waist  
675 circumference among chinese women. *Nutr J.* 2013;12(1):10-12. doi:10.1186/1475-  
676 2891-12-10  
677 42. Petry N, Wirth JP, Adu-Afarwuah S, et al. Risk factors for anaemia among Ghanaian  
678 women and children vary by population group and climate zone. *Matern Child Nutr.*  
679 2021;17(2):1-10. doi:10.1111/mcn.13076  
680 43. Liyew AM, Tesema GA, Alamneh TS, et al. Prevalence and determinants of anemia  
681 among pregnant women in East Africa; A multi-level analysis of recent Demographic  
682 and Health Surveys. *PLoS One.* 2021;16(4):e0250560.  
683 doi:10.1371/journal.pone.0250560  
684 44. Teshale AB, Tesema GA, Worku MG, Yeshaw Y, Tessema ZT. Anemia and its  
685 associated factors among women of reproductive age in eastern Africa: A multilevel  
686 mixed-effects generalized linear model. *PLoS One.* 2020;15(9 September):1-16.  
687 doi:10.1371/journal.pone.0238957  
688 45. Tirore LL, Mulugeta A, Belachew AB, et al. Factors associated with anaemia among  
689 women of reproductive age in Ethiopia: Multilevel ordinal logistic regression analysis.  
690 *Matern Child Nutr.* 2021;17(1):1-15. doi:10.1111/mcn.13063



- 691 46. Win HH, Ko MK. Geographical disparities and determinants of anaemia among women  
692 of reproductive age in Myanmar : analysis of the 2015 – 2016 Myanmar Demographic  
693 and Health Survey. *who-seajph.org*. 2018;7(September):107-113.
- 694 47. Pobeë RA, Setorglo J, Klevor M, Murray-Kolb LE. The prevalence of anemia and iron  
695 deficiency among pregnant Ghanaian women, a longitudinal study. *PLoS One*.  
696 2021;16(3 March):1-14. doi:10.1371/journal.pone.0248754
- 697 48. Fallatah AM, Babatin HM, Nassibi KM, Banweer MK, Fayoumi MN, Oraif AM.  
698 Maternal and Neonatal Outcomes among Obese Pregnant Women in King Abdulaziz  
699 University Hospital: A Retrospective Single-Center Medical Record Review. *Med Arch*  
700 *(Sarajevo, Bosnia Herzegovina)*. 2019;73(6):425-432.  
701 doi:10.5455/medarh.2019.73.425-432
- 702 49. Rincón-Pabón D, González-Santamaría J, Urazán-Hernández Y. Prevalence and  
703 sociodemographic factors associated with iron deficiency anemia in pregnant women of  
704 Colombia (secondary analysis of the ENSIN 2010). *Nutr Hosp*. 2019;36(1):87-95.  
705 doi:10.20960/nh.1895
- 706 50. WHO. *WHO Guideline on Use of Ferritin Concentrations to Assess Iron Status in*  
707 *Individuals and Populations*. World Health Organization; 2020.  
708 <https://www.who.int/publications-detail/9789240000124>
- 709 51. Mwangi MN, Maskey S, Andang'o PEA, Noel KS, Johanna MR, Trijsburg L, et al.  
710 Diagnostic utility of zinc protoporphyrin to detect iron deficiency in Kenyan pregnant  
711 women. *BMC Med*. 2014;12(1). doi:10.1186/s12916-014-0229-8  
712

713

## 714 **Supporting information**

715 **S1 Dataset. This is the S1 File Title.**

716

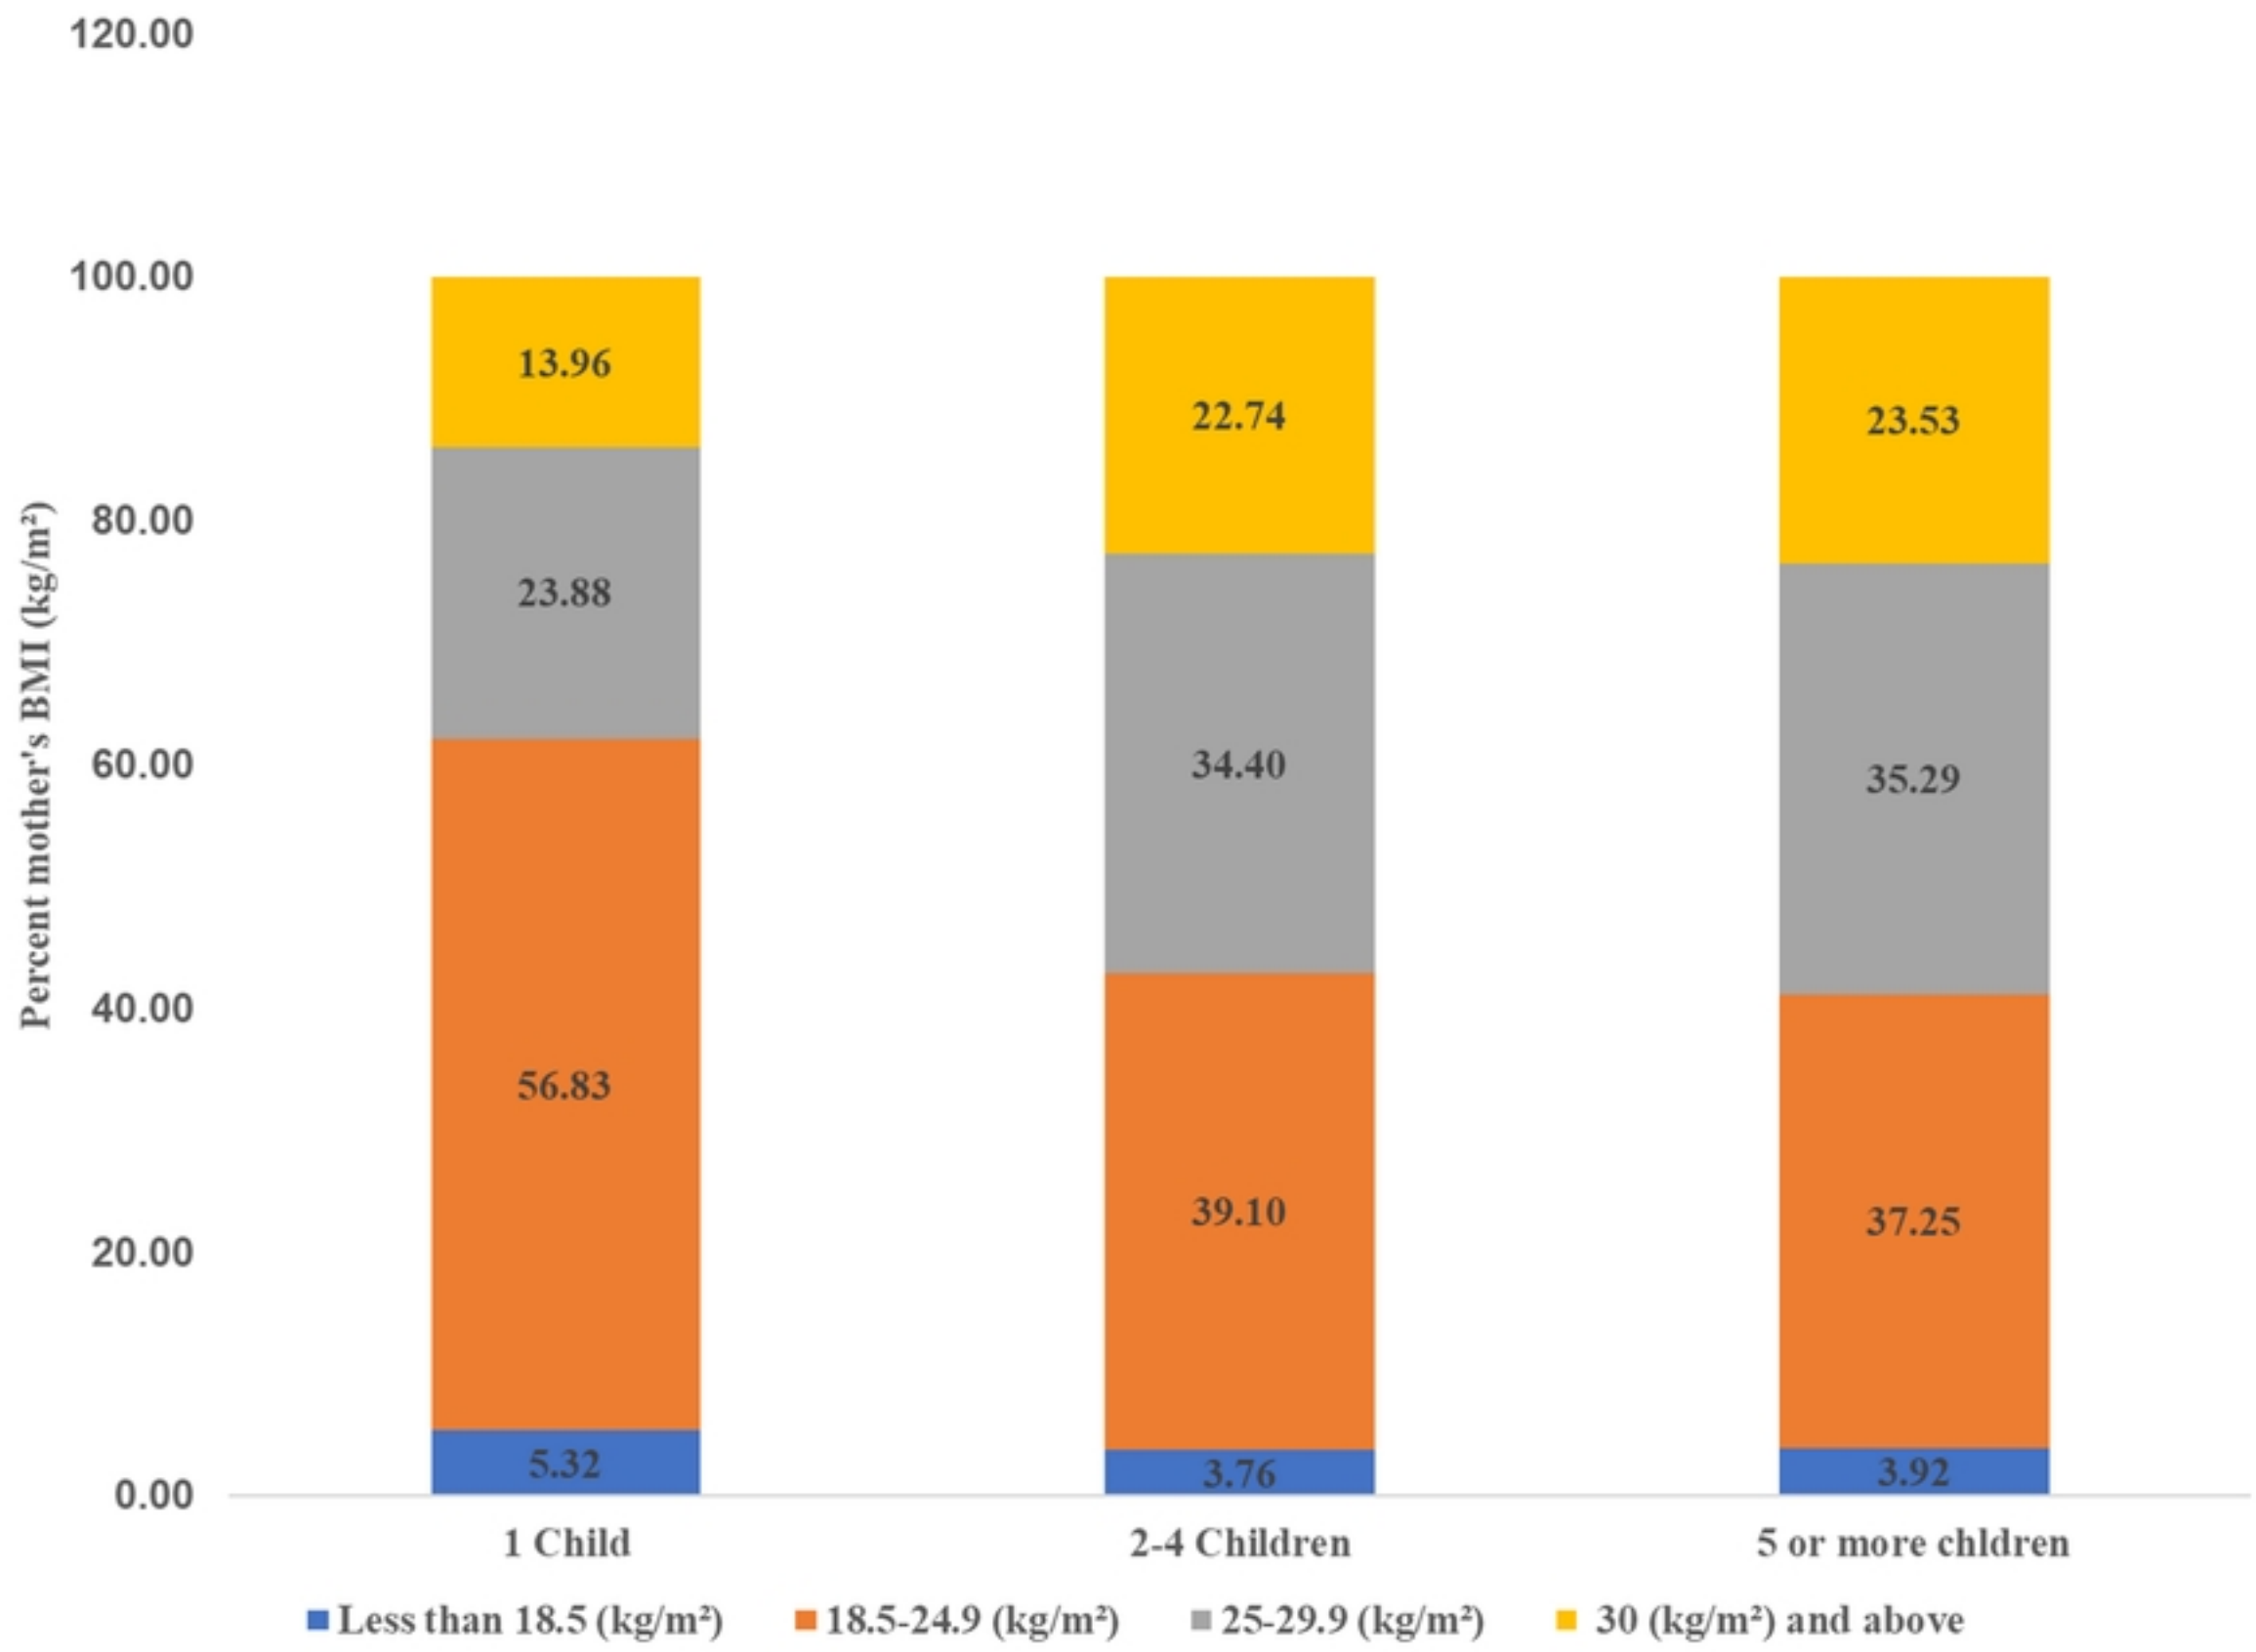

Figure

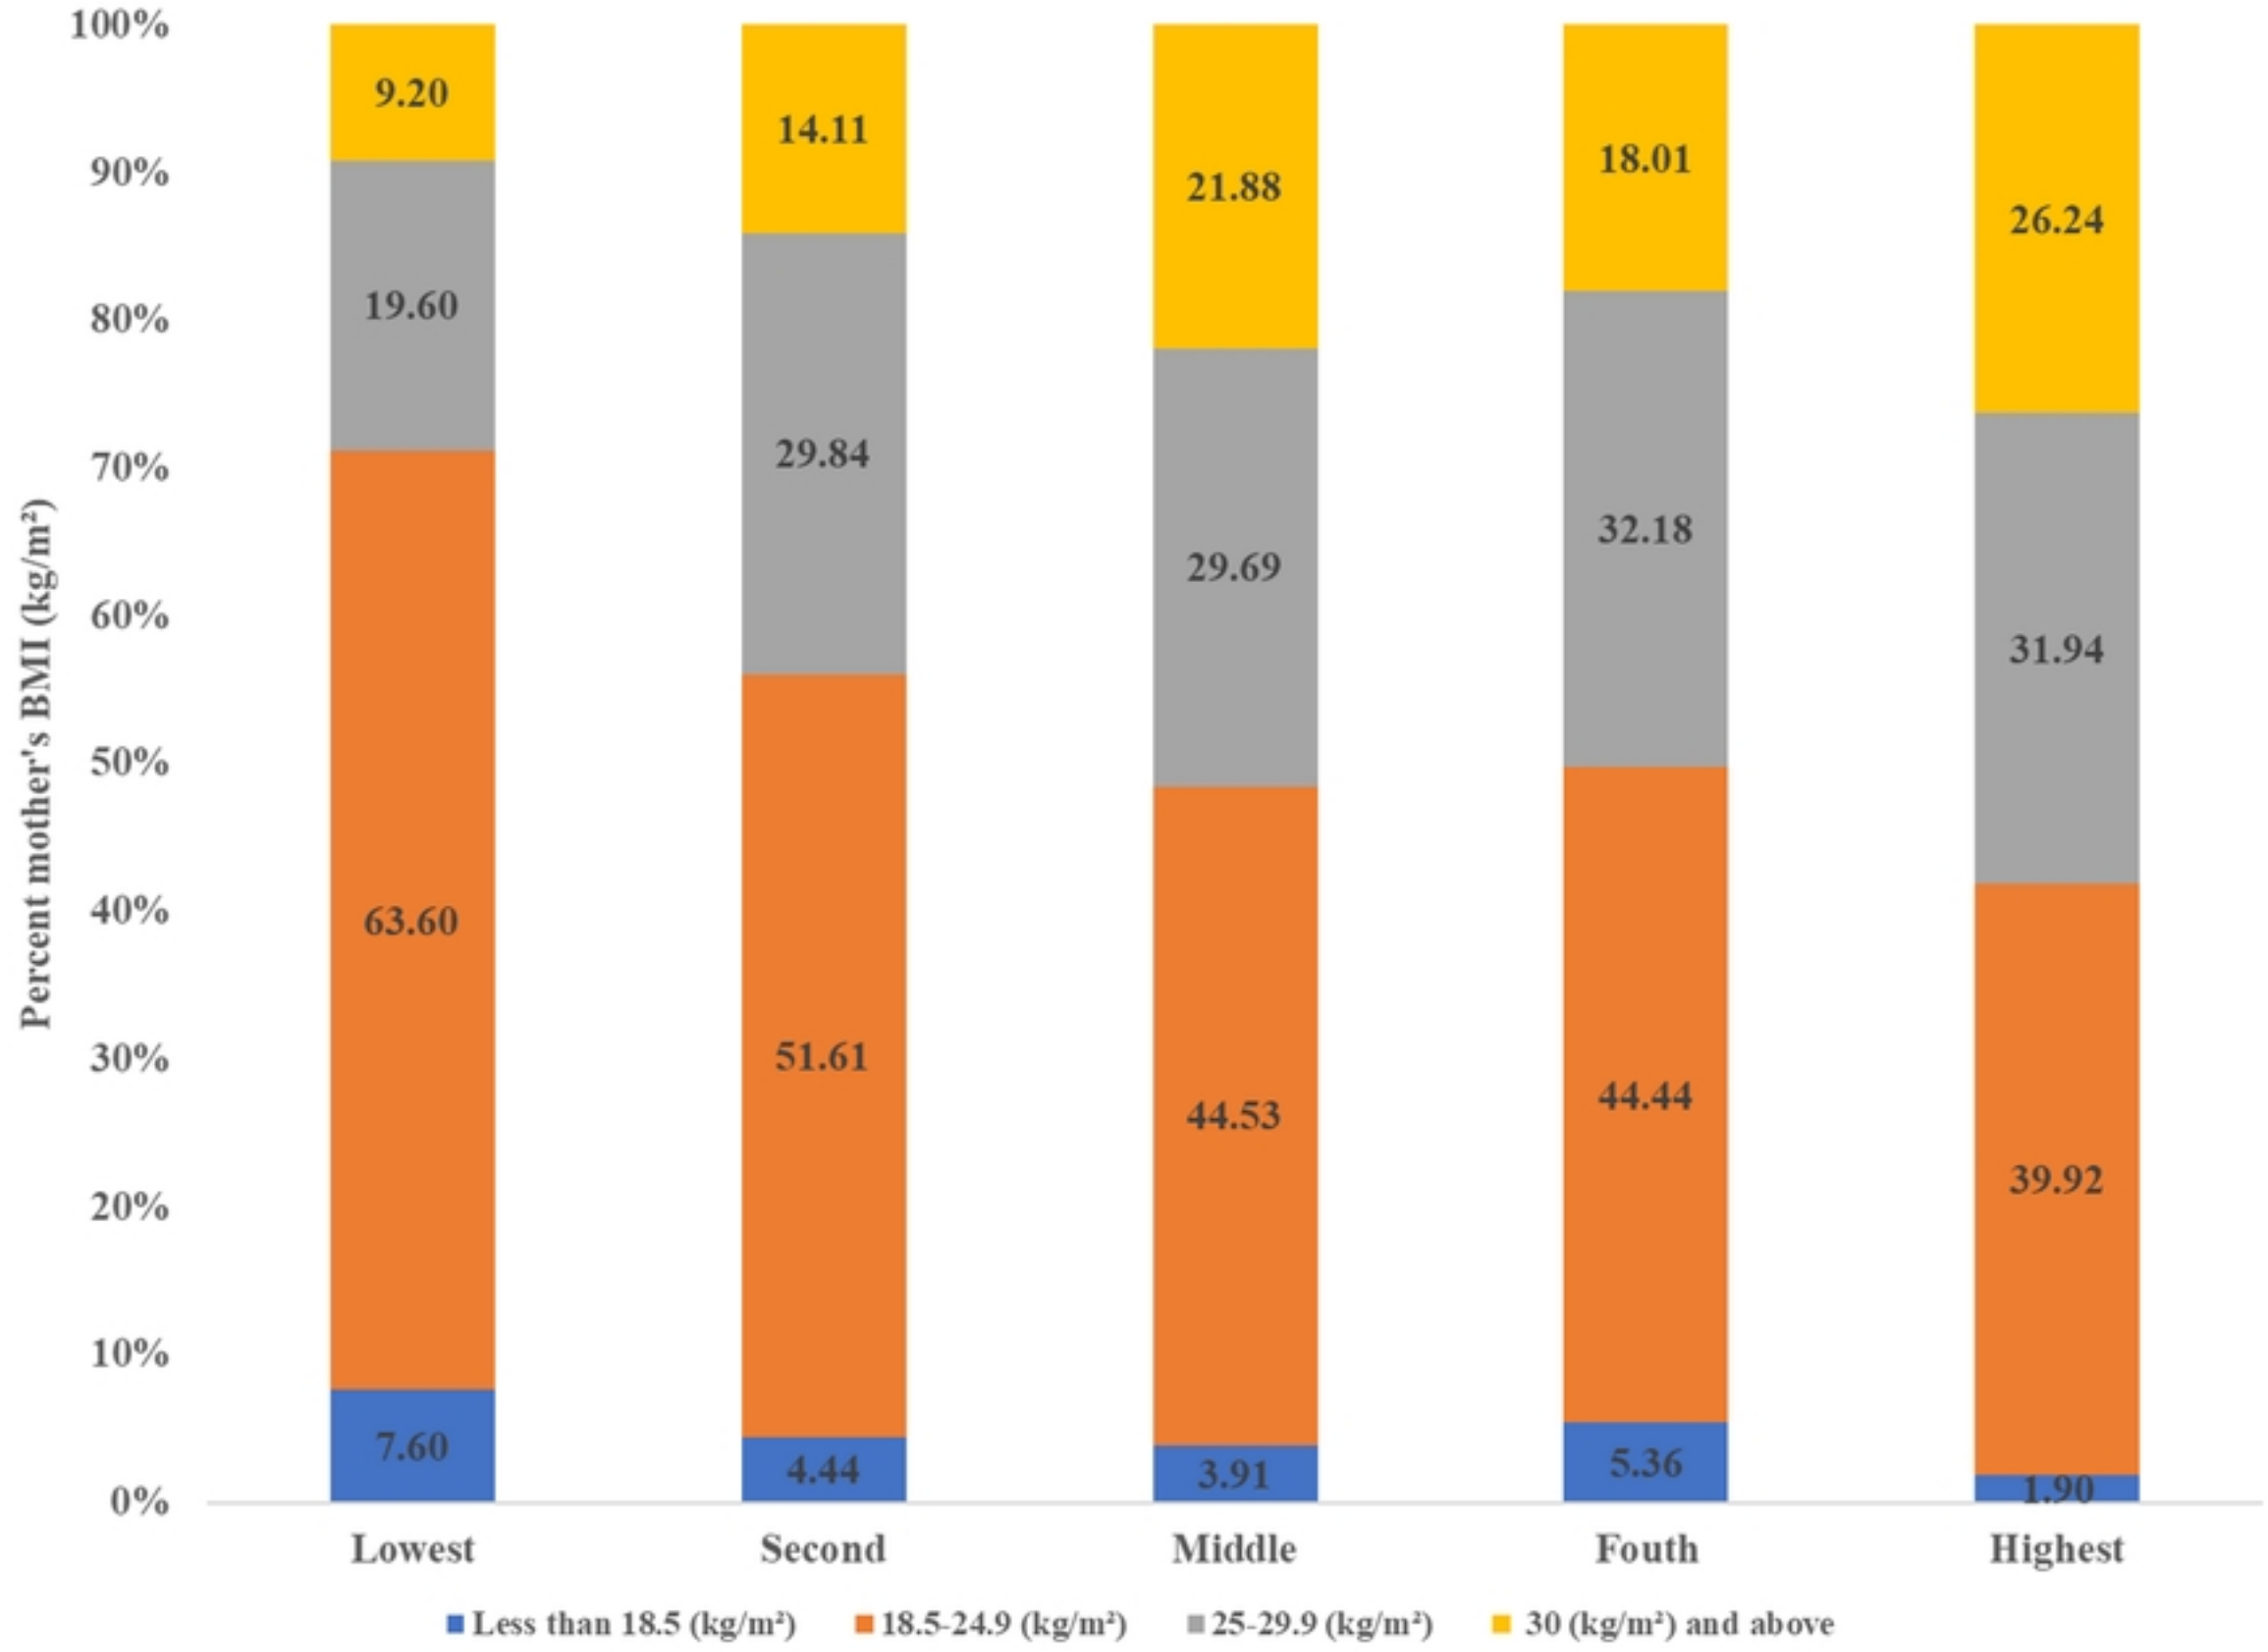

Figure
